# Supplementary material
Source: publisher figshare collection journal article supplement (https://acs.figshare.com/ndownloader/files/22206045)
Supplement: Supplementary file 1 [file 22206045]

## Supporting Information

### Experimental details

All experiments were performed in evacuated tubes, using standard Schlenk-tube or glove-box techniques, with rigorous exclusion of traces of moisture and air. After drying over KOH, THF was purified by distillation from sodium/benzophenone ketyl, hexane and toluene by distillation from sodium/triglyme benzophenone ketyl prior to use. C<sub>6</sub>D<sub>6</sub> was dried with sodium/benzophenone ketyl and condensed in vacuo prior to use. Ap'H and KAp' (Ap'-H = (2,6-diisopropylphenyl)-[6-(2,6-dimethylphenyl)-pyridin-2-yl]-amine) were synthesized according to previously published procedures.<sup>1,2</sup> Anhydrous YCl<sub>3</sub><sup>3</sup> was prepared according to literature procedures. All other commercially available chemicals were used after the appropriate purification. NMR spectra were recorded on a Bruker DPX 200 or on a Bruker ARX 250 or on a Varian Inova 400 or on a Varian Inova 300 spectrometer. Chemical shifts for <sup>1</sup>H and <sup>13</sup>C spectra were referenced internally using the residual solvent resonances and are reported relative to TMS. IR spectra were recorded as Nujol mulls on FSM 1201 and Specord M80 instruments. Lanthanide metal analysis were carried out by complexometric titration. The C, H elemental analysis was made in the microanalytical laboratory of IOMC and at Bayreuth University using a Vario elementar EL III elemental analyser.

**Synthesis of [YAp'<sub>2</sub>Cl(thf)] (1):** A solution of KAp' (0.48 g, 1.21 mmol in 30 mL of THF) was added to a suspension of YCl<sub>3</sub> (0.12 g, 0.61 mmol) in THF (5 mL) and the reaction mixture was stirred for 7 h at 50 °C. After cooling to the room temperature THF was evaporated in vacuum and the remaining residue was extracted with toluene (30 mL). The extracts were filtered and the solvent was removed under vacuum and the resulting yellow solid was redissolved in THF. Slow condensation of hexane into concentrated THF solution afforded complex **1** as yellow crystals. The crystals were washed with cold hexane and dried in vacuum at room temperature (45 min). Yield (0.48 g, 87 %). IR (Nujol, KBr, cm<sup>-1</sup>): 3060 m, 1584 s, 1545 s, 1349s, 1252 m, 1160 s, 1059 m,

1015 s, 856 s, 795 s, 778 s, 746 s.  $^1\text{H}$  NMR (200 MHz,  $\text{C}_7\text{D}_8$ , 298 K):  $\delta$  = 1.10 (d,  $^3J_{\text{H-H}} = 7.0$  Hz, 24H,  $\text{H}^{23,24,25,26}$ ), 1.41 (br s, 4H,  $\beta\text{-CH}_2$ , THF), 2.20 (s, 12H,  $\text{H}^{13,14}$ ), 3.29 (sept,  $^3J_{\text{H-H}} = 7.0$  Hz, 4H,  $\text{H}^{21,22}$ ), 3.54 (br, s, 4H,  $\alpha\text{-CH}_2$ , THF), 5.71 (d,  $^3J_{\text{H-H}} = 6.8$  Hz, 2H,  $\text{H}^3$ ), 5.86 (d,  $^3J_{\text{H-H}} = 8.3$  Hz, 2H,  $\text{H}^5$ ), 6.37 (d,  $^3J_{\text{H-H}} = 7.3$  Hz, 2H,  $\text{H}^4$ ), 6.70-7.15 (m, 12H,  $\text{H}^{9,10,11,17,18,19}$ ) ppm.  $^{13}\text{C}\{^1\text{H}\}$  NMR (50 MHz,  $\text{C}_7\text{D}_8$ , 298 K):  $\delta$  = 20.1 ( $\text{C}^{13,14}$ ), 23.5 ( $\text{C}^{23,24,25,26}$ ), 24.4 ( $\text{C}^{23,24,25,26}$ ), 25.3 ( $\beta\text{-CH}_2$ , THF), 28.0 ( $\text{C}^{21,22}$ ), 28.4 ( $\text{C}^{21,22}$ ), 67.7 ( $\alpha\text{-CH}_2$ , THF), 103.4 ( $\text{C}^{3,5}$ ), 114.2 ( $\text{C}^{3,5}$ ), 123.8, 124.7, 127.3, 127.4, 127.6, 127.9 ( $\text{C}^{9,10,11,17,18,19}$ ), 139.2 ( $\text{C}^4$ ), 141.5 ( $\text{C}^7$ ), 144.2, 147.7 ( $\text{C}^{8,12,16,20}$ ), 156.0 ( $\text{C}^{15}$ ), 159.0 ( $\text{C}^6$ ), 159.6 ( $\text{C}^2$ ) ppm. Anal. Calcd for  $\text{C}_{54}\text{H}_{66}\text{Cl ON}_4\text{Y}$  (910.95): C, 71.19; H, 7.24; N 6.15; Y, 9.76. Found: C, 71.02; H, 7.58; N, 6.25; Y, 9.60.

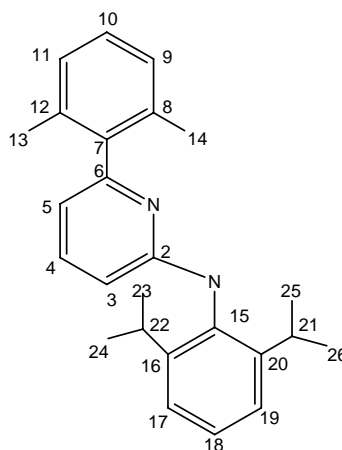

**Synthesis of  $[\text{YAp}'_2\text{CH}_2\text{SiMe}_3(\text{thf})]$  (**2**):** A hexane solution of  $\text{LiCH}_2\text{SiMe}_3$  (0.021 g, 0.22 mmol in 30 mL) was added to a suspension of **1** (0.19 g, 0.21 mmol) in hexane (20 mL) and the reaction mixture was stirred for 1 h. The mixture was filtered and hexane was removed in vacuum. The yellow solid residue was dissolved in toluene-hexane mixture ( $\sim 1:5$ ). Slow cooling of the concentrated solution of complex **2** to  $-20^\circ\text{C}$  afforded yellow crystals of **2**. The crystals were separated from the mother liquor by decantation, washed with cold hexane and dried in vacuum at room temperature (40 min). Yield (0.13 g, 65 %). IR (Nujol, KBr,  $\text{cm}^{-1}$ ): 3060 m, 1584 s, 1547 s, 1356 s, 1249 m, 1157 m, 861 s, 801 m, 778 s, 768s.  $^1\text{H}$  NMR (200 MHz,  $\text{C}_6\text{D}_6$ , 298 K):  $\delta$  = - 0.39 (m, 2H,  $\text{CH}_2\text{SiMe}_3$ ), 0.20 (s, 9H,  $\text{CH}_2\text{Si}(\text{CH}_3)_3$ ), 0.97-1.37 (m, 24H,  $\text{H}^{23,24,25,26}$ ), 1.39 (br s, 4H,  $\beta\text{-}$

CH<sub>2</sub>, THF), 1.57, 2.24, (s, together 12H, H<sup>13,14</sup>), 3.34 (m, 4H, H<sup>21,22</sup>), 3.59 (br s, 4H, α-CH<sub>2</sub>, THF), 5.70 (m, 4H, H<sup>3,5</sup>), 6.68 -7.26 (m, 14 H, H<sup>4, 9, 10, 11, 17, 18, 19</sup>) ppm. <sup>13</sup>C NMR (50 MHz, C<sub>6</sub>D<sub>6</sub>, 298 K): δ = 3.9 (Si(CH<sub>3</sub>)<sub>3</sub>), 19.5, 20.9 (C<sup>13,14</sup>), 24.4, 24.6, 24.7, 24.9 (C<sup>23,24,25,26</sup>), 25.3 (β-CH<sub>2</sub>, THF), 28.1, 29.4 (C<sup>21,22</sup>), 43.3 (d, CH<sub>2</sub>, J<sub>Y-C</sub> = 43 Hz), 68.4 (α-CH<sub>2</sub>, THF), 106.1, 109.3 (C<sup>3,5</sup>), 124.1, 124.4, 127.9, 128.0 (C<sup>9,11,17,19</sup>), 125.1, 128.2 (C<sup>10,18</sup>), 135.8, 136.1 (C<sup>8,12</sup>), 139.5 (C<sup>7</sup>), 140.6 (C<sup>4</sup>), 142.9 (C<sup>15</sup>), 143.9, 144.0 (C<sup>16,20</sup>), 155.7 (C<sup>6</sup>), 169.1 (C<sup>2</sup>) ppm. Anal. Calcd for C<sub>58</sub>H<sub>77</sub>N<sub>4</sub>OSiY (962.7): C, 72.36; H, 7.99; N, 5.82; Y, 9.23. Found: C, 72.00; H, 7.87; N, 5.78; Y, 9.43.

**Synthesis of [YAp'(Ap-H)(thf)] (3):** A solution of PhSiH<sub>3</sub> (0.057 g, 0.53 mmol) in toluene (3 mL) was added to a solution of **2** (0.51 g, 0.53 mmol) in toluene (30 mL) at room temperature and the reaction mixture was stirred for 1 h. Toluene was removed under vacuum and the solid residue was washed with cold hexane. The remaining solid residue was dissolved in heptane (30 mL) at room temperature. Slow concentration of the heptane solution afforded **3** as yellow crystals. The crystals were separated from the mother liquor by decantation, washed with cold hexane and dried in vacuum at room temperature (30 min). Yield (0.33 g, 72 %). IR (Nujol, KBr, cm<sup>-1</sup>): 3064 m, 1594 s, 1584 s, 1575 s, 1362 s, 1325 m, 1260 m, 1157 m, 1804 m, 1060 m, 986 m, 846 m, 800 m, 778 m, 768 m. <sup>1</sup>H NMR (200 MHz, C<sub>6</sub>D<sub>6</sub>, 298 K): δ = 0.97-1.56 (m, together 30H, H<sup>23,24,25,26</sup>, β-CH<sub>2</sub>, THF, CH<sub>2</sub>Y), 1.89-2.36 (m, together 9H, H<sup>13,14</sup>), 3.34 (br s, 4H, H<sup>21,22</sup>), 3.52 (br, s, 4H, α-CH<sub>2</sub>, THF), 5.72 (m, 4H, H<sup>3,5</sup>), 6.70 -7.27 (m, 14 H, H<sup>4, 9, 10, 11, 17, 18, 19</sup>) ppm. <sup>13</sup>C NMR (50 MHz, C<sub>6</sub>D<sub>6</sub>, 298 K): δ = 20.2, 22.3 (C<sup>13,14</sup>), 24.0, 24.9 (C<sup>23,24,25,26</sup>), 25.2 (β-CH<sub>2</sub>, THF), 28.2, 28.5 (C<sup>21,22</sup>), 58.3 (d, CH<sub>2</sub>, J<sub>Y-C</sub> = 30.9 Hz), 68.4 (α-CH<sub>2</sub>, THF), 105.7, 107.7, 108.6 (C<sup>3,5</sup>), 123.6, 123.9, 124.0, 124.1, 124.4, 127.0, 127.3, 127.5, 127.9, 128.1 (C<sup>9,10,11,17,18,19</sup>), 139.5, 140.0, (C<sup>4</sup>), 134.2, 135.6, 135.9, 140.8, 143.6, 143.8, 145.0, 145.6 (C<sup>7,8,12,15,16,20</sup>), 153.9, 155.8 (C<sup>6</sup>), 167.7, 171.9 (C<sup>2</sup>) ppm. Anal. Calcd for C<sub>54</sub>H<sub>65</sub>N<sub>4</sub>OY (874.5): C, 74.16; H, 7.43; N, 6.40; Y, 10.16. Found: C, 73.82; H, 7.09; N, 6.22; Y, 9.80.

**Synthesis of  $\text{Ap}'_2\text{YCH}_2\text{Ph}(\text{THF})$ :** A mixture of  $\text{Y}(\text{CH}_2\text{Ph})_3(\text{THF})_3$  (0.102 g, 0.18 mmol) and  $\text{Ap}'\text{H}$  (0.126 mg, 0.35 mmol) was dissolved in THF (10 mL). After stirring the mixture for 1 h all volatiles were removed to yield  $[\text{Ap}'_2\text{YCH}_2\text{Ph}(\text{THF})]$  as a pale yellow residue in almost quantitative yield.

$^1\text{H}$ -NMR (400 MHz,  $\text{THF-d}_8$ , 253 K):  $\delta$  = 0.52 (d, 3H,  $^3J(\text{H,H}) = 6.7$  Hz,  $\text{H}^{23,24,25,26}$ ), 0.75 (d, 3H,  $^3J(\text{H,H}) = 6.7$  Hz,  $\text{H}^{23,24,25,26}$ ), 0.76 (d, 3H,  $^3J(\text{H,H}) = 6.7$  Hz,  $\text{H}^{23,24,25,26}$ ), 0.81 (d, 3H,  $^3J(\text{H,H}) = 6.7$  Hz,  $\text{H}^{23,24,25,26}$ ), 0.90 (d, 3H,  $^3J(\text{H,H}) = 6.7$  Hz,  $\text{H}^{23,24,25,26}$ ), 0.94 (d, 3H,  $^3J(\text{H,H}) = 6.7$  Hz,  $\text{H}^{23,24,25,26}$ ), 0.97 (d, 3H,  $^3J(\text{H,H}) = 6.7$  Hz,  $\text{H}^{23,24,25,26}$ ), 1.15 (d, 3H,  $^3J(\text{H,H}) = 6.7$  Hz,  $\text{H}^{23,24,25,26}$ ), 1.68 (br, 4H,  $\beta\text{-CH}_2$ , THF), 1.76 (s, 3H,  $\text{H}^{13,14}$ ), 1.82 (s, 3H,  $\text{H}^{13,14}$ ), 2.14 (s, 3H,  $\text{H}^{13,14}$ ), 2.16 (br, 2H,  $\text{CH}_2\text{Ph}$ ), 2.30 (s, 3H,  $\text{H}^{13,14}$ ), 2.86 (sept, 1H,  $^3J(\text{H,H}) = 6.7$  Hz,  $\text{H}^{21,22}$ ), 3.06 (sept, 1H,  $^3J(\text{H,H}) = 6.7$  Hz,  $\text{H}^{21,22}$ ), 3.14 (sept, 1H,  $^3J(\text{H,H}) = 6.7$  Hz,  $\text{H}^{21,22}$ ), 3.37 (sept, 1H,  $^3J(\text{H,H}) = 6.7$  Hz,  $\text{H}^{21,22}$ ), 3.53 (br, 4H,  $\alpha\text{-CH}_2$ , THF), 5.65 (d, 1H,  $^3J(\text{H,H}) = 8.6$  Hz,  $\text{H}^3$ ), 5.74 (d, 1H,  $^3J(\text{H,H}) = 8.6$  Hz,  $\text{H}^3$ ), 5.80 (d, 2H, Benzyl-H, ortho), 5.92 (d, 1H,  $^3J(\text{H,H}) = 7.0$  Hz,  $\text{H}^5$ ), 5.97 (d, 1H,  $^3J(\text{H,H}) = 7.0$  Hz,  $\text{H}^5$ ), 6.10 (t, 1H, Benzyl-H, para), 6.43 (t, 2H,  $\text{H}^4$ ), 6.85-7.27 (m, 14H,  $\text{H}^{9,10,11,17,18,18}$ /Benzyl H, meta) ppm.

$^{13}\text{C}$ -NMR ( $\text{C}_6\text{D}_6$ , 298 K):  $\delta$  = 19.6, 20.8 ( $\text{C}^{13,14}$ ), 23.5, 22.6, 24.7, 25.1 ( $\text{C}^{23,24,25,26}$ ), 25.5 ( $\beta\text{-CH}_2$ , THF), 28.3, 29.5 ( $\text{C}^{21,22}$ ), 60.3 (d,  $\text{CH}_2$ ,  $J_{\text{Y-C}} = 39$  Hz), 70.9 ( $\alpha\text{-CH}_2$ , THF), 107.3, 109.6 ( $\text{C}^{3,5}$ ), 117.6 ( $\text{C}^{\text{Ph}}$ ), 122.1 ( $\text{C}^{\text{Ph}}$ ), 124.3, 124.7, 127.4, 128.2 ( $\text{C}^{9,11,17,19}$ ), 125.5, 128.9 ( $\text{C}^{10,18}$ ), 131.9 ( $\text{C}^{\text{Ph}}$ ), 135.7, 136.2 ( $\text{C}^{8,12}$ ), 139.8 ( $\text{C}^7$ ), 140.3 ( $\text{C}^4$ ), 140.9 ( $\text{C}^{15}$ ), 141.3, 144.9 ( $\text{C}^{16,20}$ ), 154.0 ( $\text{C}^{\text{Ph}}$ ), 156.0 ( $\text{C}^6$ ), 170.9 ( $\text{C}^2$ ) ppm.

Anal. Calcd for  $\text{C}_{61}\text{H}_{73}\text{N}_4\text{OY}$  (967.2): C, 75.75; H, 7.61; N, 5.79. Found: C, 75.57; H, 7.49; N, 5.59.

**X-ray crystallography.** The data were collected on a SMART APEX diffractometer or on a STOE IPDS II diffractometer (graphite-monochromated,  $\text{MoK}_\alpha$ -radiation,  $\lambda = 0.71073$  Å). The structures were solved by direct methods and were refined on  $F^2$  using SHELXTL<sup>5</sup> package or using SIR97,<sup>6</sup> SHELXL-97<sup>7</sup> and WinGX<sup>8</sup>. All non-hydrogen atoms were refined anisotropically. SADABS<sup>9</sup> or face identification (numerical) was used to perform absorption corrections.

1. Scott, N. M.; Kempe, R. *Eur. J. Inorg. Chem.* **2005**, 1319-1324.
2. Scott, N. M.; Schareina, T.; Tok, O.; Kempe, R. *Eur. J. Inorg. Chem.* **2004**, 33297-3304.
3. Taylor, M. D.; Carter, C. P. *J. Inorg. Nucl. Chem.* **1962**, 24, 387
4. S. Bambirra, A. Meetsma, B. Hessen, *Organometallics* **2006**, 25, 3454-3462. S. Bambirra private communication.
5. Sheldrick, G.M. (1998a). SADABS v.2.01, Bruker/Siemens Area Detector Absorption Correction Program, Bruker AXS, Madison, Wisconsin, USA.
6. Altomare, A.; Burla, M.C.; Camalli, M.; Cascarano, G.L.; Giacovazzo, C.; Guagliardi, A.; Moliterni, A.G.G.; Polidori, G.; Spagna, R. *J. Appl. Cryst.* **1999**, 32, 115-119.
- 7 Sheldrick, G.M. (1998) SHELX-97, Program for Crystal Structure Analysis (Release 97-2)., Institut für Anorganische Chemie der Universität, Göttingen, Germany.
8. Farrugia, L.J. *J. Appl. Crystallogr.* **1999**, 32, 837-838.
9. Sheldrick, G.M. (2000). SHELXTL v. 6.12, Structure Determination Software Suite, Bruker AXS, Madison, Wisconsin, USA.

## X-ray structure determination of complex 1.

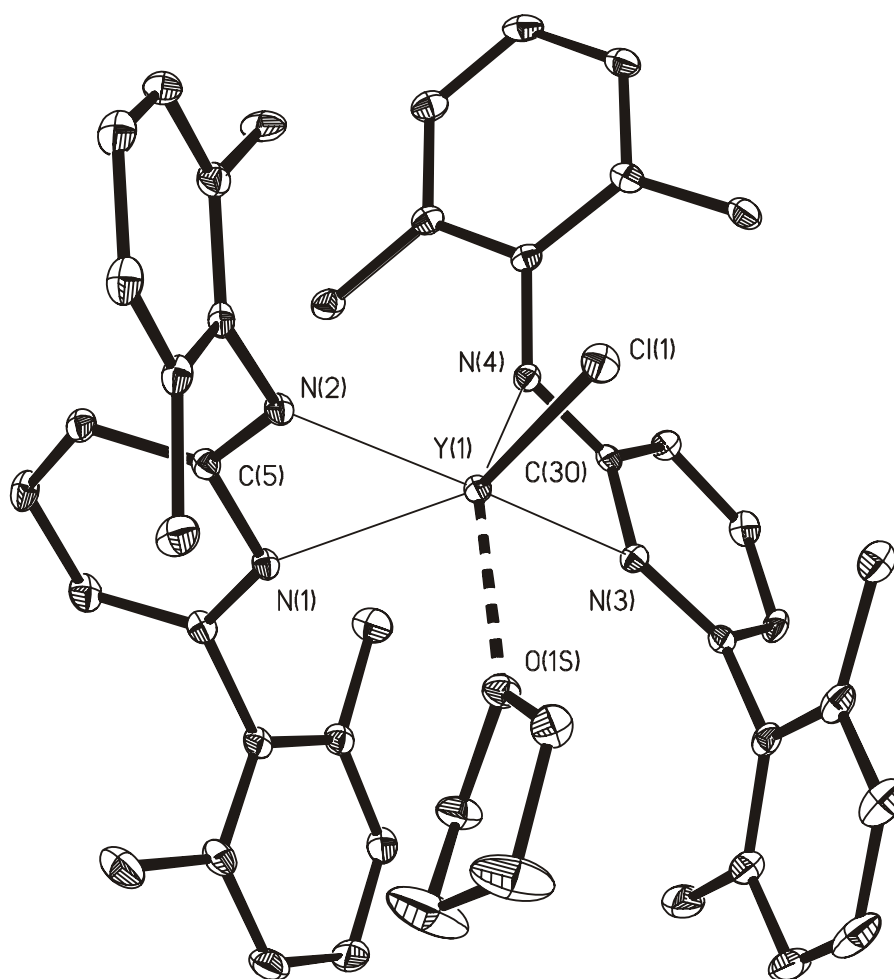

**Figure 1.** ORTEP diagram (30% probability thermal ellipsoids) of  $\text{Ap}'_2\text{YCl}(\text{THF})$  (**1**) showing the non-hydrogen and non-carbon (except C(5) and C(30)) atom numbering scheme. Hydrogen and methyl carbon atoms of isopropyl groups are omitted. Selected bond distances [ $\text{\AA}$ ] and angles [ $^\circ$ ]: Y(1)-N(2) 2.2828(13), Y(1)-N(4) 2.3068(13), Y(1)-O(1S) 2.3314(11), Y(1)-N(3) 2.4483(13), Y(1)-N(1) 2.5097(12), Y(1)-Cl(1) 2.5154(4), N(2)-Y(1)-N(4) 106.85(4), N(2)-Y(1)-N(3) 157.95(4), N(4)-Y(1)-N(3) 57.17(4), N(2)-Y(1)-N(1) 56.20(4), N(4)-Y(1)-N(1) 95.56(4).
